# Supplementary material
Source: ML conference proceedings conference paper supplement (https://aclanthology.org/2025.bionlp-1.30)

# CRISPR

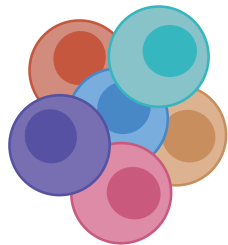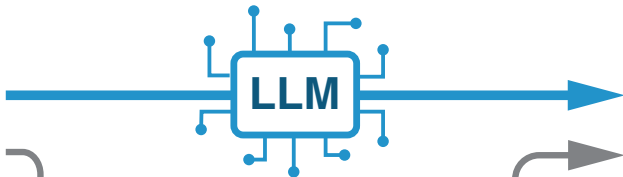

# Gene Effect

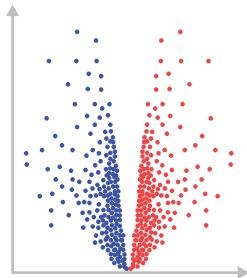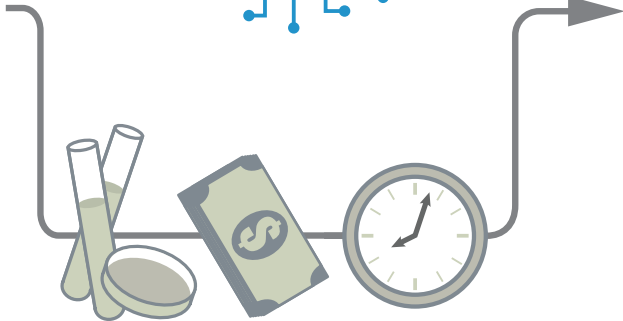

Supplement: SupplementaryMaterial [file 2025.bionlp-1.30.SupplementaryMaterial.zip]

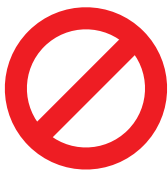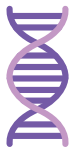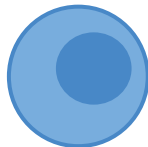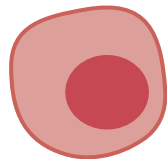

Does *[perturbation]* of *[gene]* in *[cells]* result in *[phenotype]*?

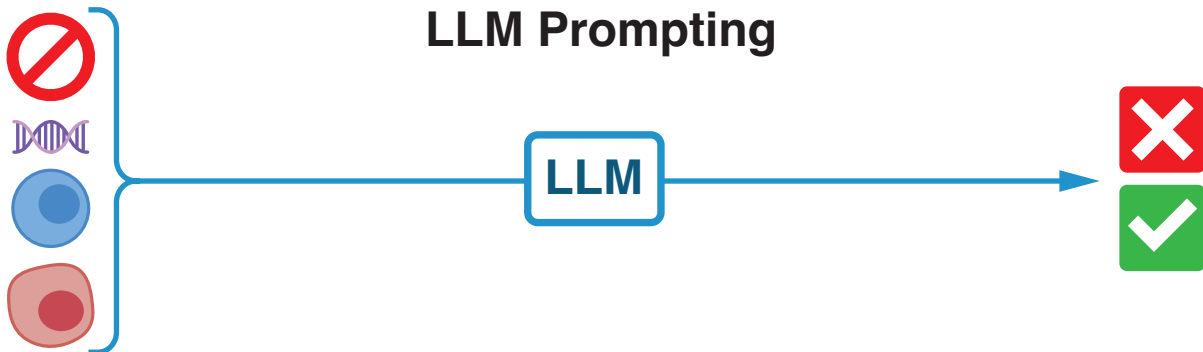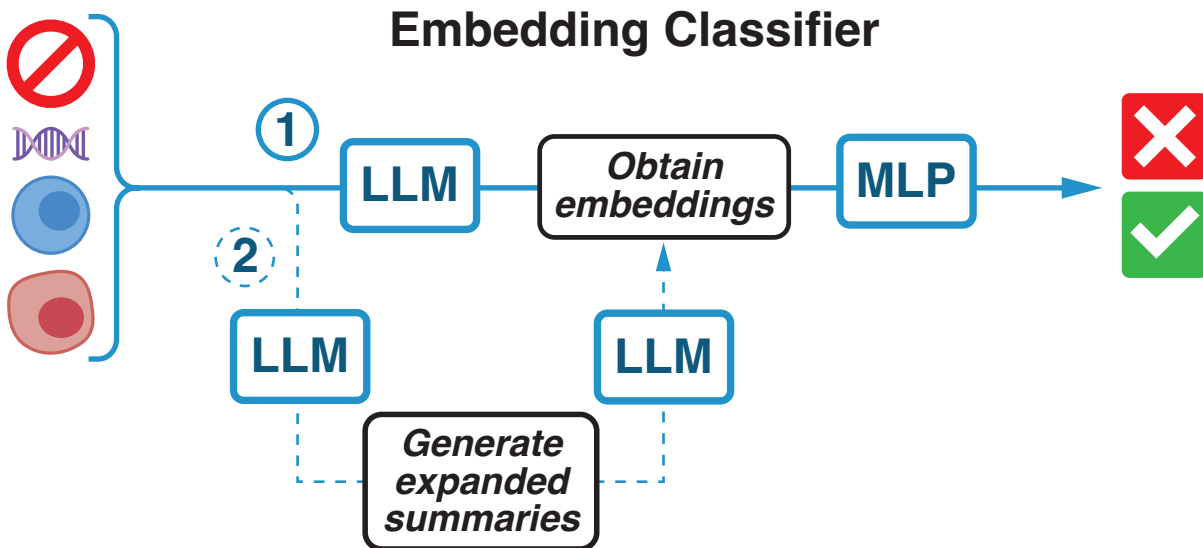

Supplement: SupplementaryMaterial [file 2025.bionlp-1.30.SupplementaryMaterial.zip]
